# Supplementary material
Source: PubMed Central journal article supplement (PMC9554673)
Supplement: NIHMS1838753-supplement-Supplemental_Material.pdf [file NIHMS1838753-supplement-Supplemental_Material.pdf]

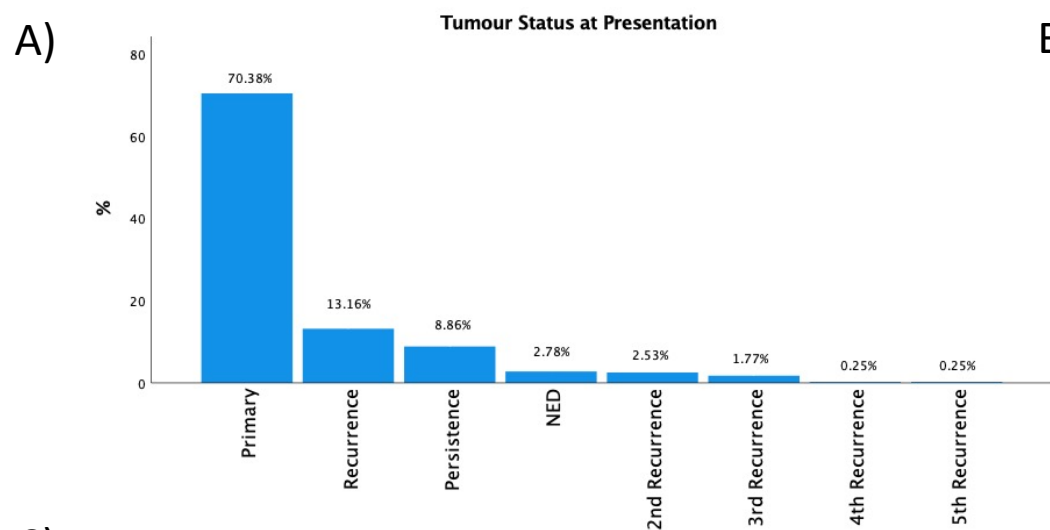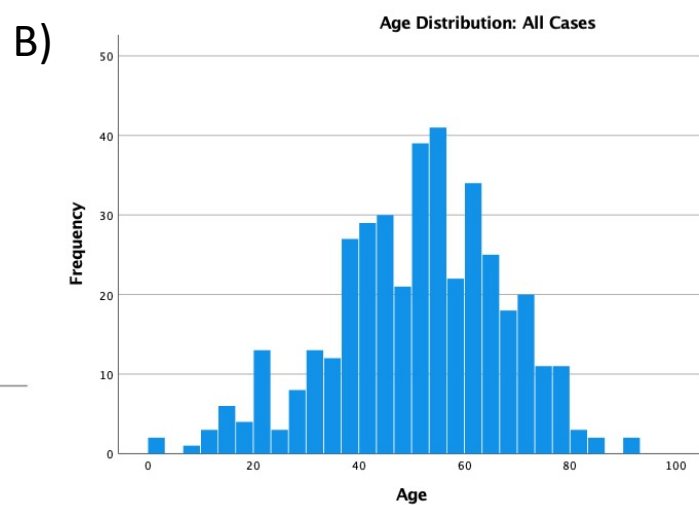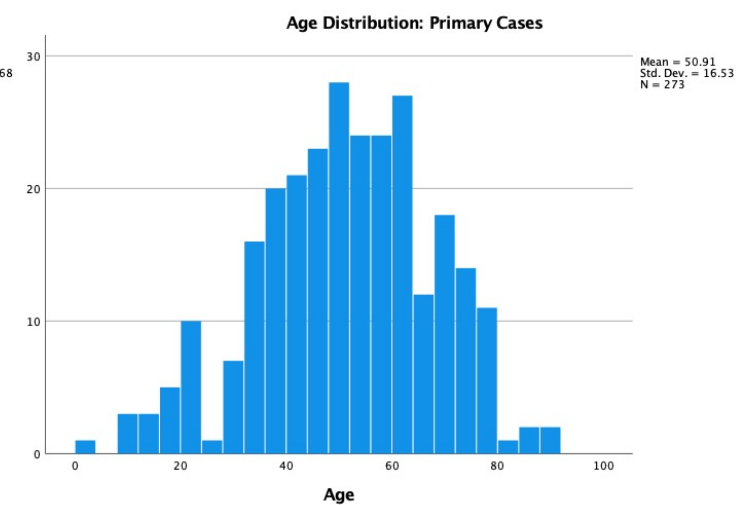

**C) Clinical Characteristics of Pediatric and Adult Cases**

|                                    | Age < 18 Years (n=11) |       | Age >= 18 Years (n=262) |      | p-value |
|------------------------------------|-----------------------|-------|-------------------------|------|---------|
|                                    | N                     | %     | N                       | %    |         |
| <b>Gender</b>                      |                       |       |                         |      | 0.759   |
| Male                               | 5                     | 45.5  | 143                     | 54.6 |         |
| Female                             | 6                     | 54.5  | 119                     | 45.4 |         |
| <b>Hyam's Grade</b>                |                       |       |                         |      | 0.076   |
| 1                                  | 4                     | 50.0  | 38                      | 16.9 |         |
| 2                                  | 3                     | 37.5  | 122                     | 54.2 |         |
| 3                                  | 0                     | 0.0   | 46                      | 20.4 |         |
| 4                                  | 1                     | 12.5  | 19                      | 8.4  |         |
| Missing                            | 3                     |       | 37                      |      |         |
| <b>Kadish-Morita Stage</b>         |                       |       |                         |      | 0.058   |
| A                                  | 0                     | 0.0   | 26                      | 10.9 |         |
| B                                  | 0                     | 0.0   | 56                      | 23.5 |         |
| C                                  | 8                     | 88.9  | 134                     | 56.3 |         |
| D                                  | 1                     | 11.1  | 22                      | 9.2  |         |
| Missing                            | 2                     |       | 24                      |      |         |
| <b>Dulguerov T-Stage</b>           |                       |       |                         |      | 0.105   |
| T1                                 | 0                     | 0.0   | 34                      | 23.6 |         |
| T2                                 | 0                     | 0.0   | 44                      | 30.6 |         |
| T3                                 | 2                     | 50.0  | 36                      | 25.0 |         |
| T4                                 | 2                     | 50.0  | 30                      | 20.8 |         |
| Missing                            | 8                     |       | 118                     |      |         |
| <b>Bony Skull Base Involvement</b> |                       |       |                         |      | 1.000   |
| No                                 | 2                     | 22.2  | 55                      | 27.9 |         |
| Yes                                | 7                     | 77.8  | 142                     | 72.1 |         |
| Missing                            | 3                     |       | 65                      |      |         |
| <b>Dural Infiltration</b>          |                       |       |                         |      | 0.739   |
| No                                 | 4                     | 44.4  | 98                      | 52.7 |         |
| Yes                                | 5                     | 55.6  | 88                      | 47.3 |         |
| Missing                            | 3                     |       | 76                      |      |         |
| <b>Intracranial Involvement</b>    |                       |       |                         |      | 0.059   |
| No                                 | 0                     | 0.0   | 66                      | 49.6 |         |
| Yes                                | 5                     | 100.0 | 67                      | 50.4 |         |
| Missing                            | 7                     |       | 129                     |      |         |
| <b>Orbital Involvement</b>         |                       |       |                         |      | 0.051   |
| No                                 | 2                     | 40.0  | 109                     | 82.0 |         |
| Yes                                | 3                     | 60.0  | 24                      | 18.0 |         |
| Missing                            | 6                     |       | 129                     |      |         |

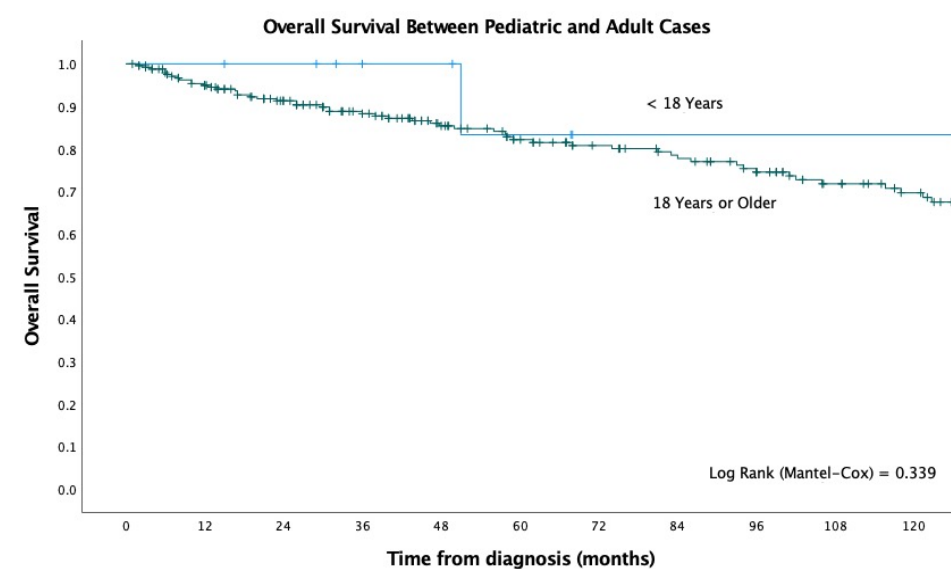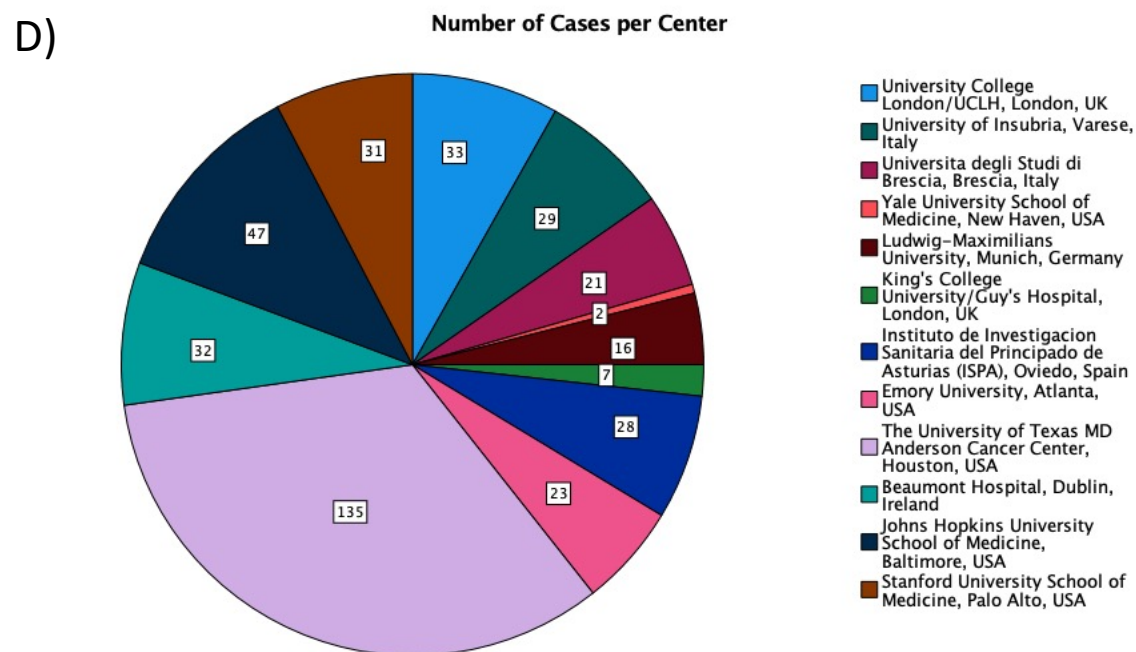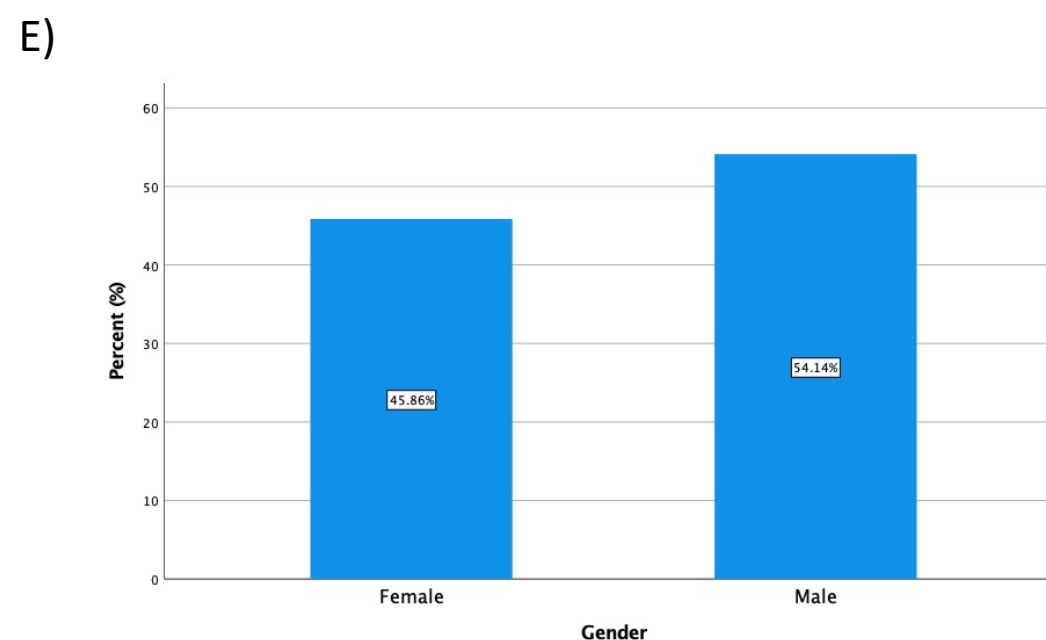

**Supplemental Figure 1.** A) Bar graph representing tumour status at presentation for all cases; B) histograms of the age distribution in all cases and in primary cases only, demonstrating a unimodal distribution C) Clinical characteristics of pediatric and adult cases and overall survival curve demonstrating similar outcome between the two subgroups. D) Pie chart illustrating distribution of cases by center. E) Bar graph presenting gender distribution for all cases.

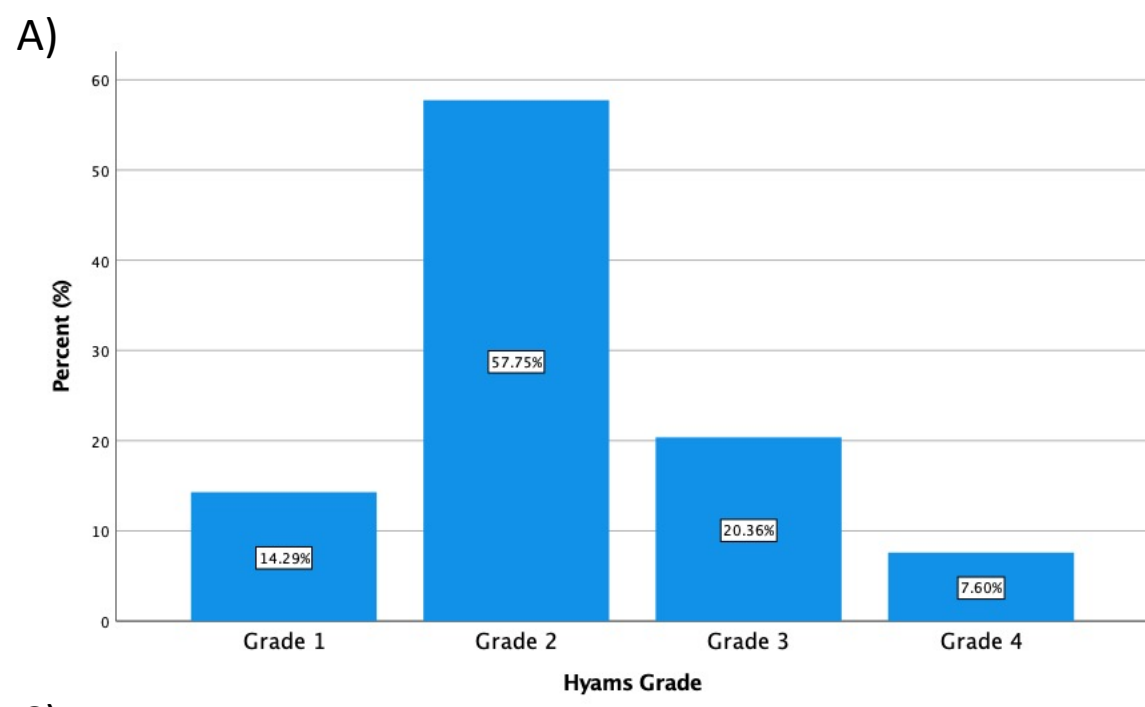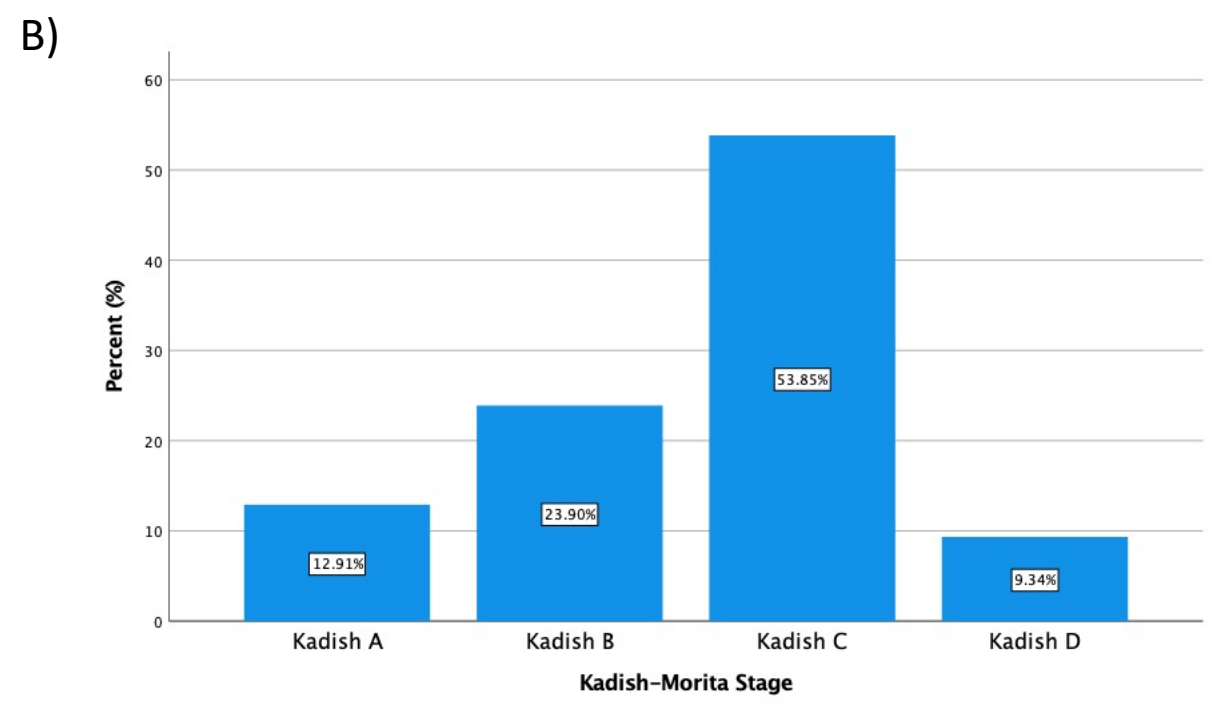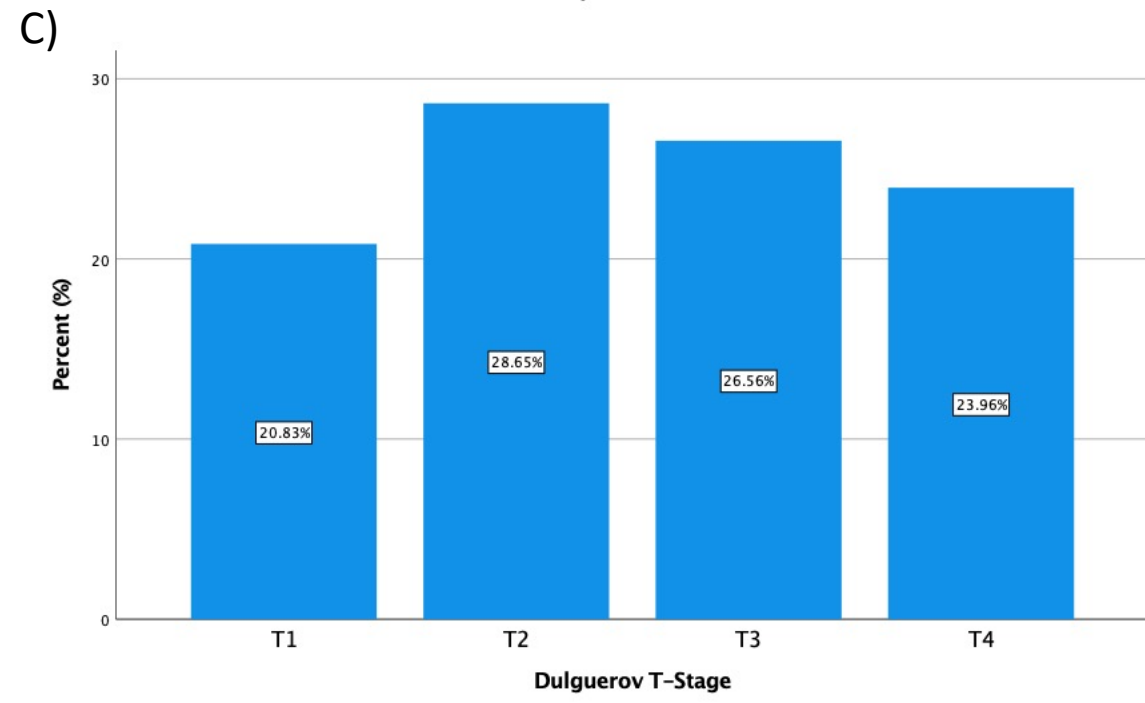

**Supplemental Figure 2.** A) – C) Bar graphs illustrating percentage of cases for each stage/grade group for each of Hyams Grade, Kadish-Morita Stage and Dulguerov T-Stage.

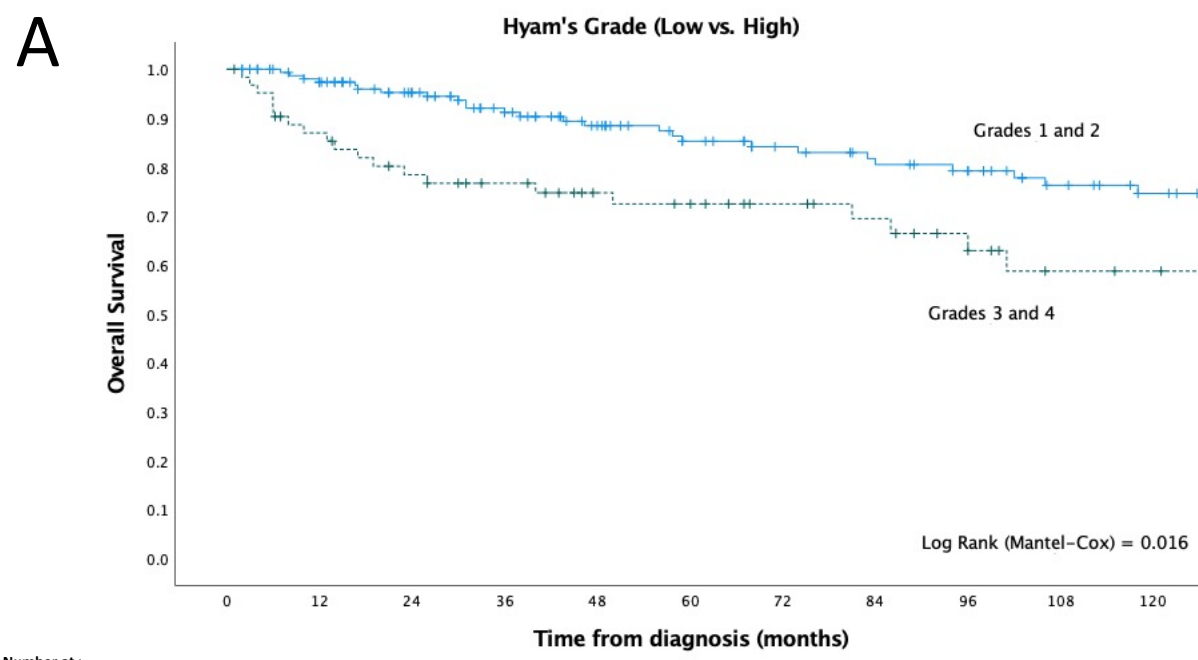

Number at risk

|                          | 0   | 12  | 24  | 36  | 48 | 60 | 72 | 84 | 96 | 108 | 120 |
|--------------------------|-----|-----|-----|-----|----|----|----|----|----|-----|-----|
| Grades 1 and 2 (n = 161) | 161 | 145 | 126 | 106 | 91 | 79 | 71 | 65 | 59 | 50  | 44  |
| Grades 3 and 4 (n = 63)  | 63  | 52  | 45  | 40  | 33 | 31 | 26 | 23 | 17 | 13  | 12  |

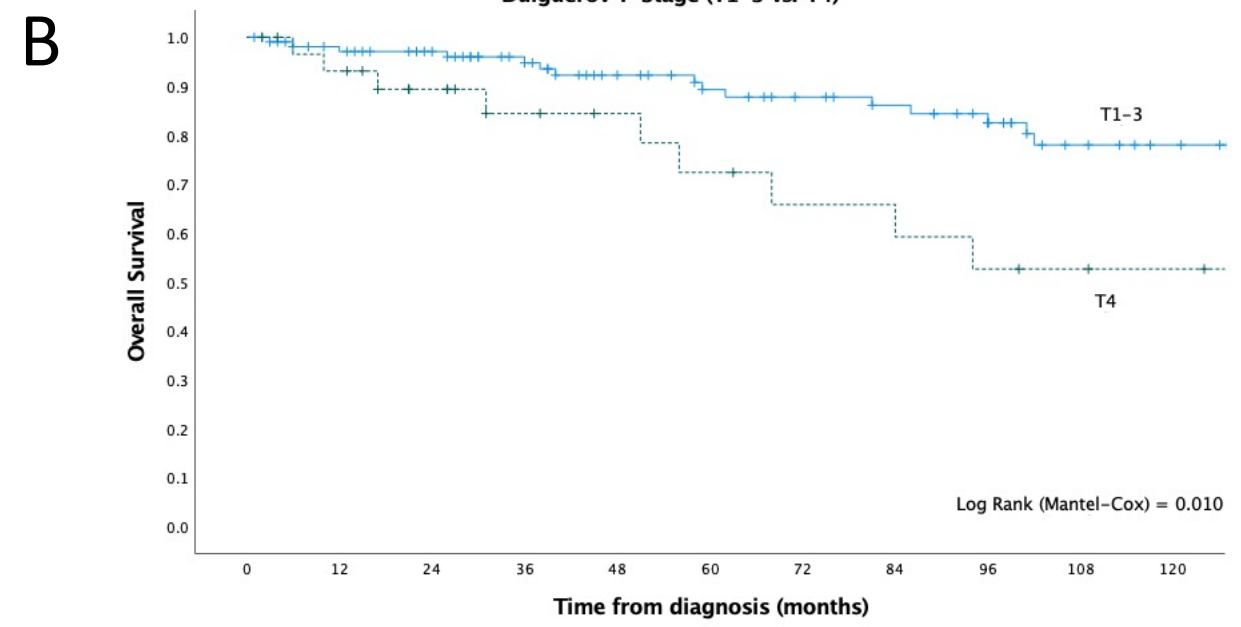

Number at risk

|                | 0   | 12 | 24 | 36 | 48 | 60 | 72 | 84 | 96 | 108 | 120 |
|----------------|-----|----|----|----|----|----|----|----|----|-----|-----|
| T1-3 (n = 108) | 108 | 97 | 89 | 77 | 66 | 59 | 54 | 50 | 41 | 32  | 28  |
| T4 (n = 31)    | 31  | 27 | 21 | 16 | 14 | 12 | 10 | 9  | 8  | 7   | 6   |

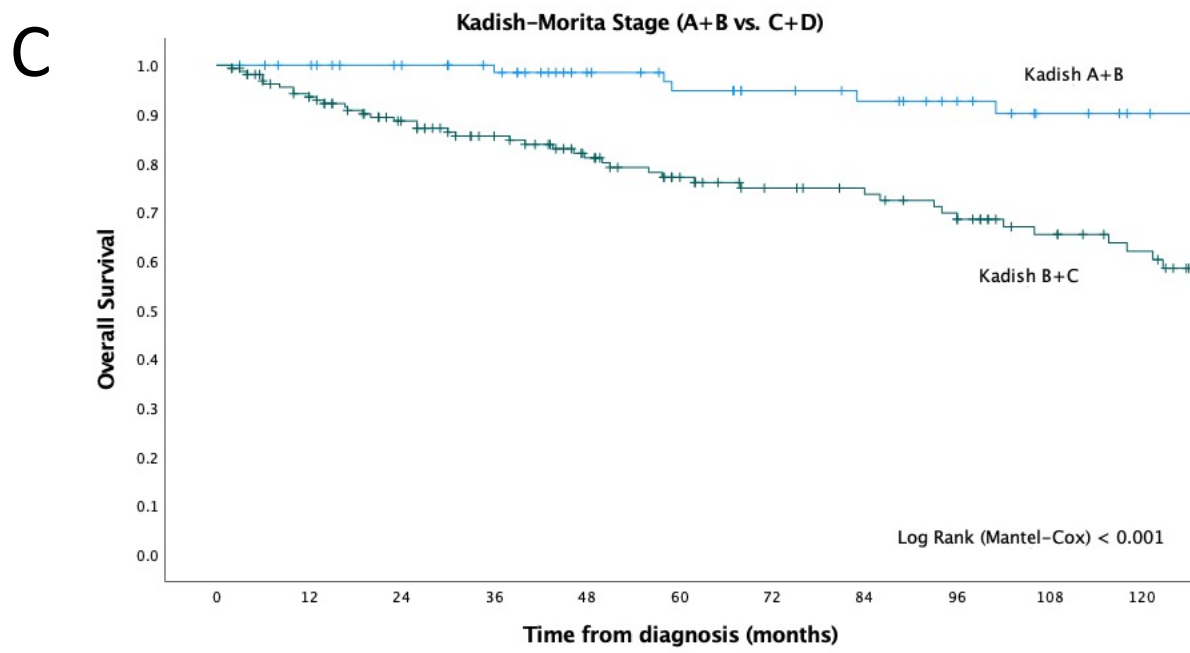

Number at risk

|                      | 0   | 12  | 24  | 36  | 48 | 60 | 72 | 84 | 96 | 108 | 120 |
|----------------------|-----|-----|-----|-----|----|----|----|----|----|-----|-----|
| Kadish A+B (n = 80)  | 80  | 77  | 71  | 66  | 56 | 51 | 46 | 43 | 38 | 33  | 30  |
| Kadish C+D (n = 161) | 161 | 139 | 118 | 101 | 86 | 73 | 63 | 59 | 51 | 42  | 36  |

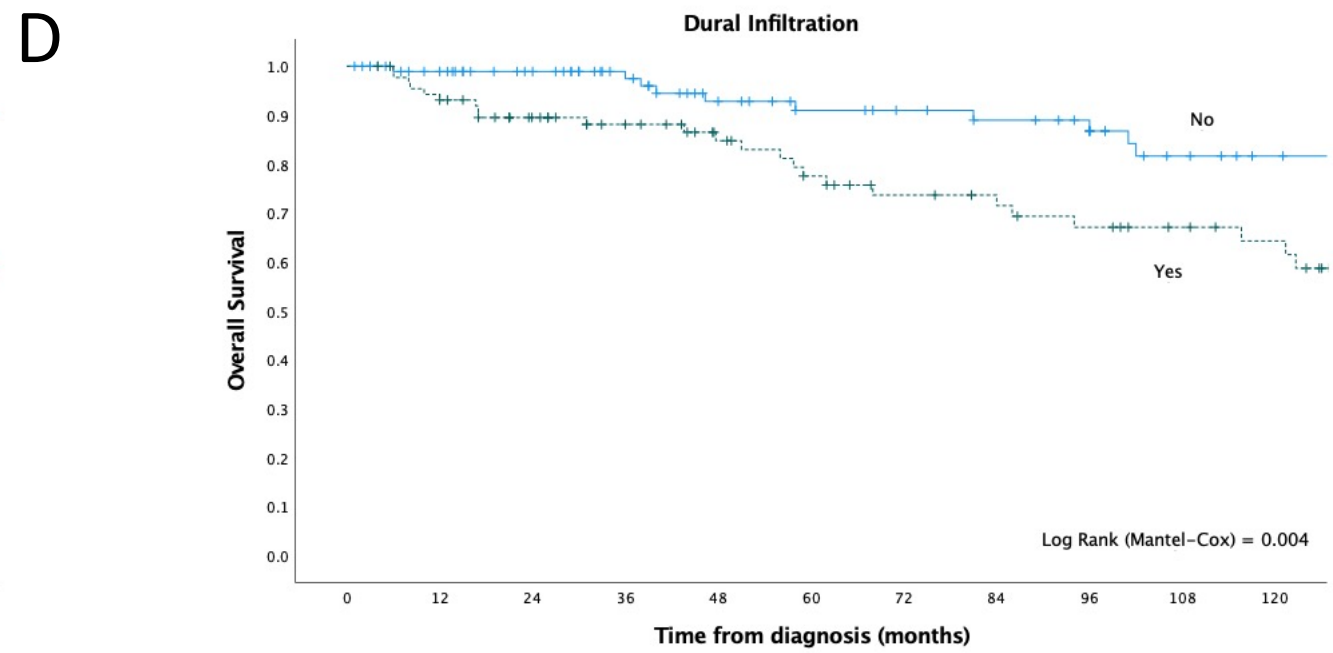

Number at risk

|                             | 0  | 12 | 24 | 36 | 48 | 60 | 72 | 84 | 96 | 108 | 120 |
|-----------------------------|----|----|----|----|----|----|----|----|----|-----|-----|
| Dural Infiltration (n = 89) | 89 | 80 | 68 | 58 | 49 | 42 | 36 | 33 | 30 | 26  | 23  |
| None (n = 99)               | 99 | 88 | 78 | 67 | 55 | 49 | 46 | 43 | 36 | 30  | 26  |

**Supplemental Figure 3.** A) – C) Additional Kaplan-Meier survival analyses of Dulguerov T-stage dichotomized into T1-3 vs. T4 and Kadish-Morita stage dichotomized into A+B vs. C+D, respectively; D) Kaplan-Meier survival analysis of dural infiltration.

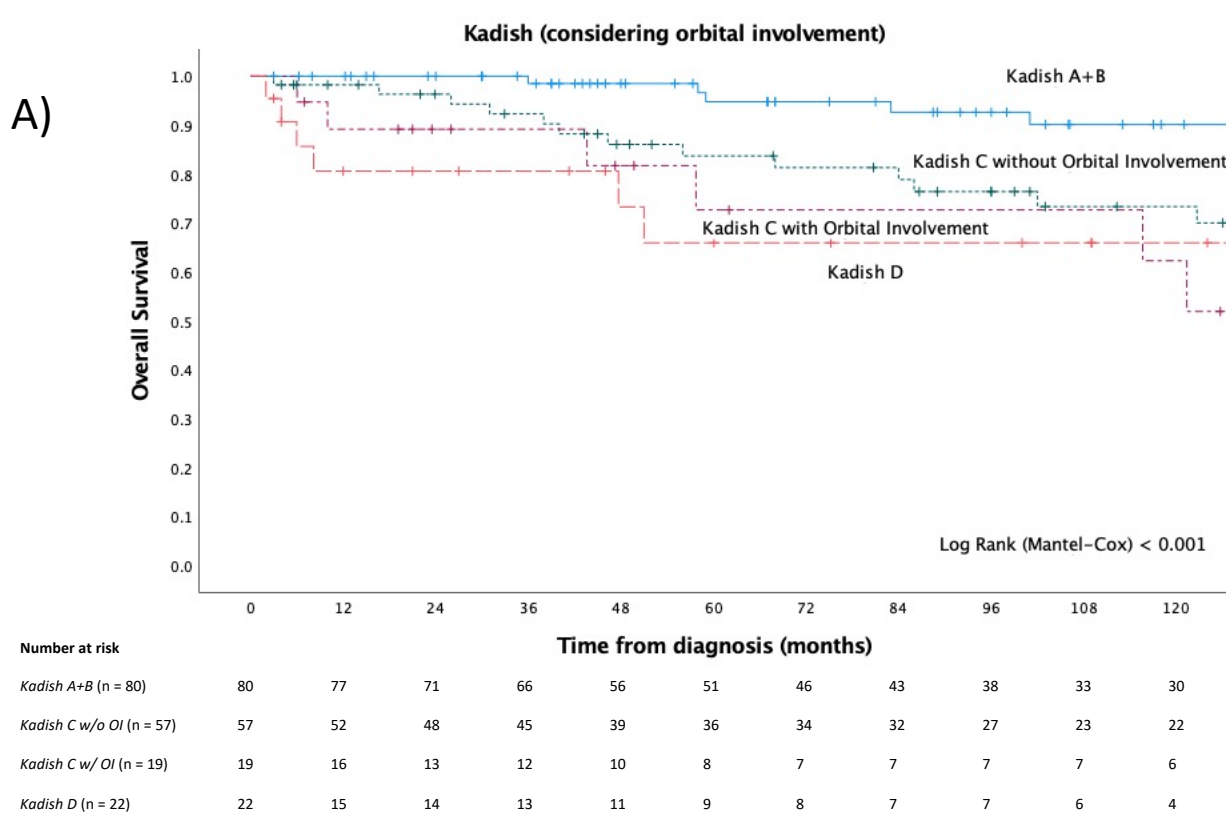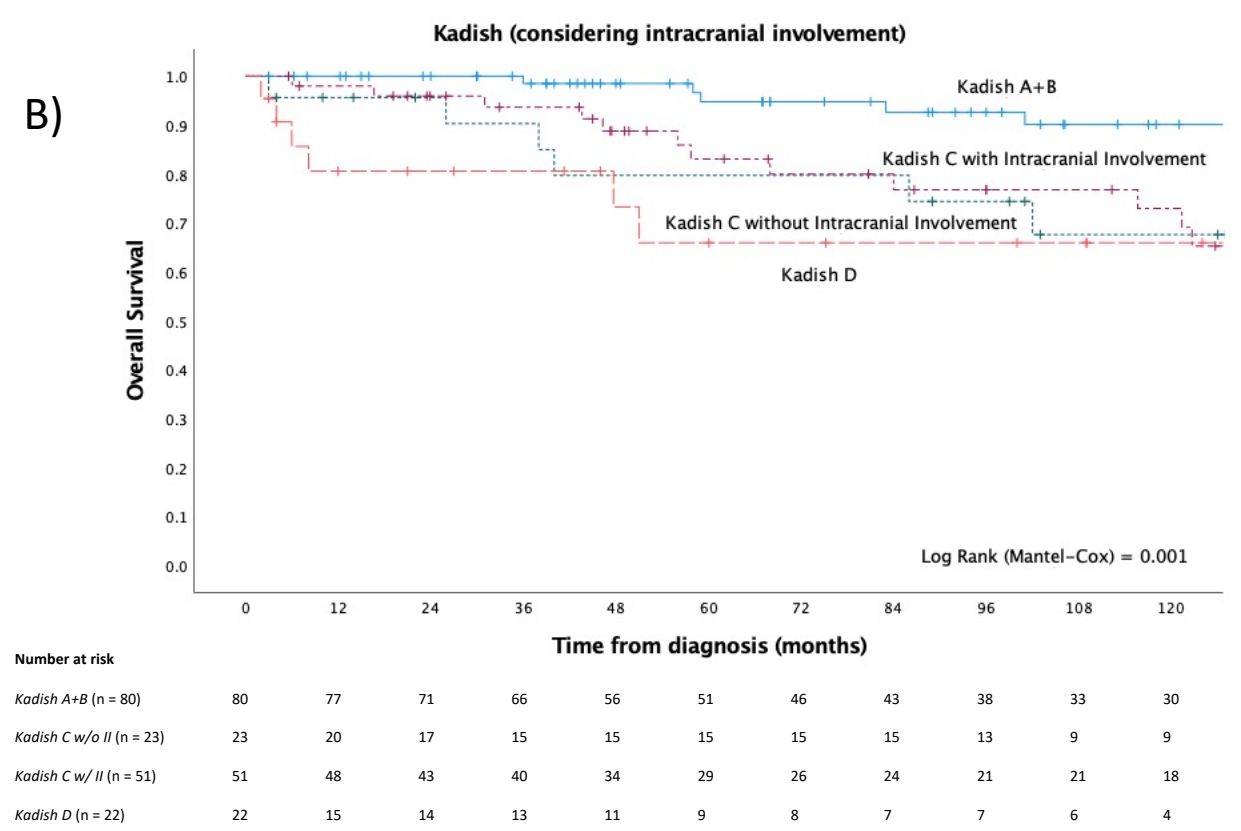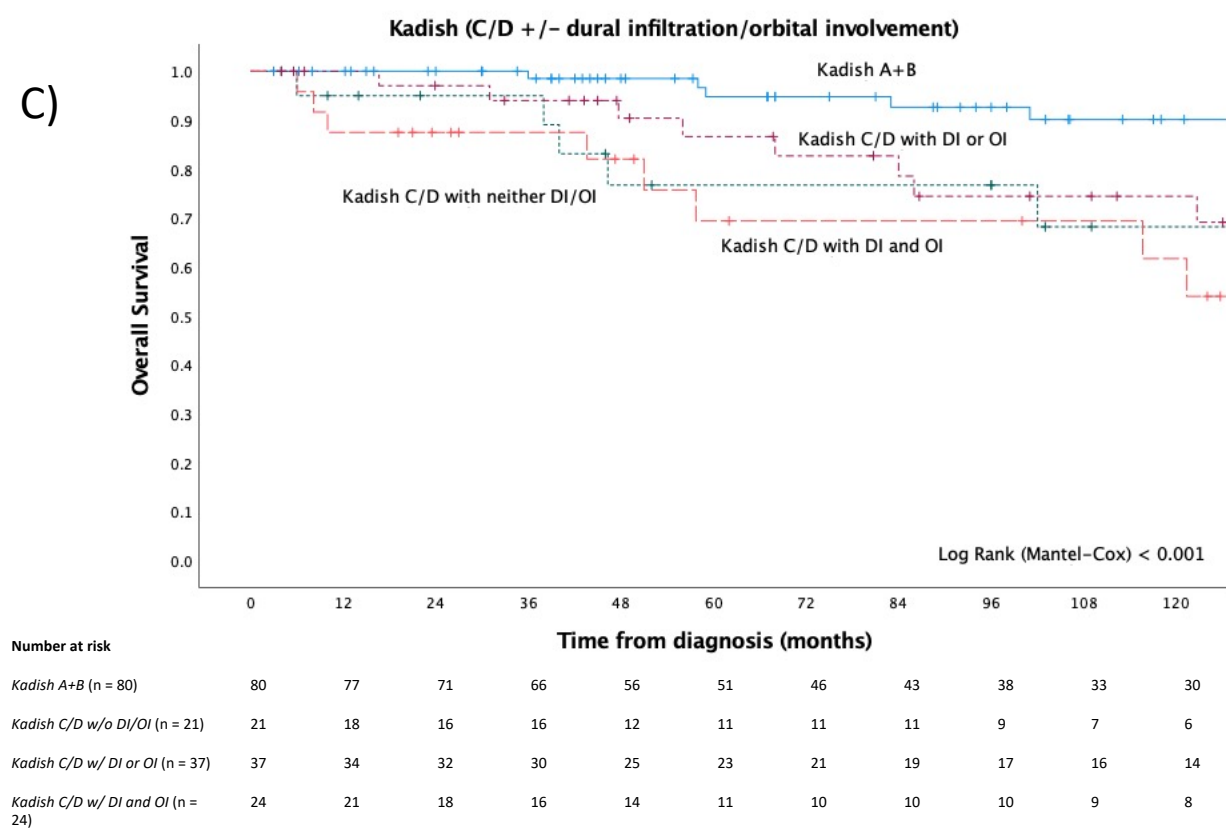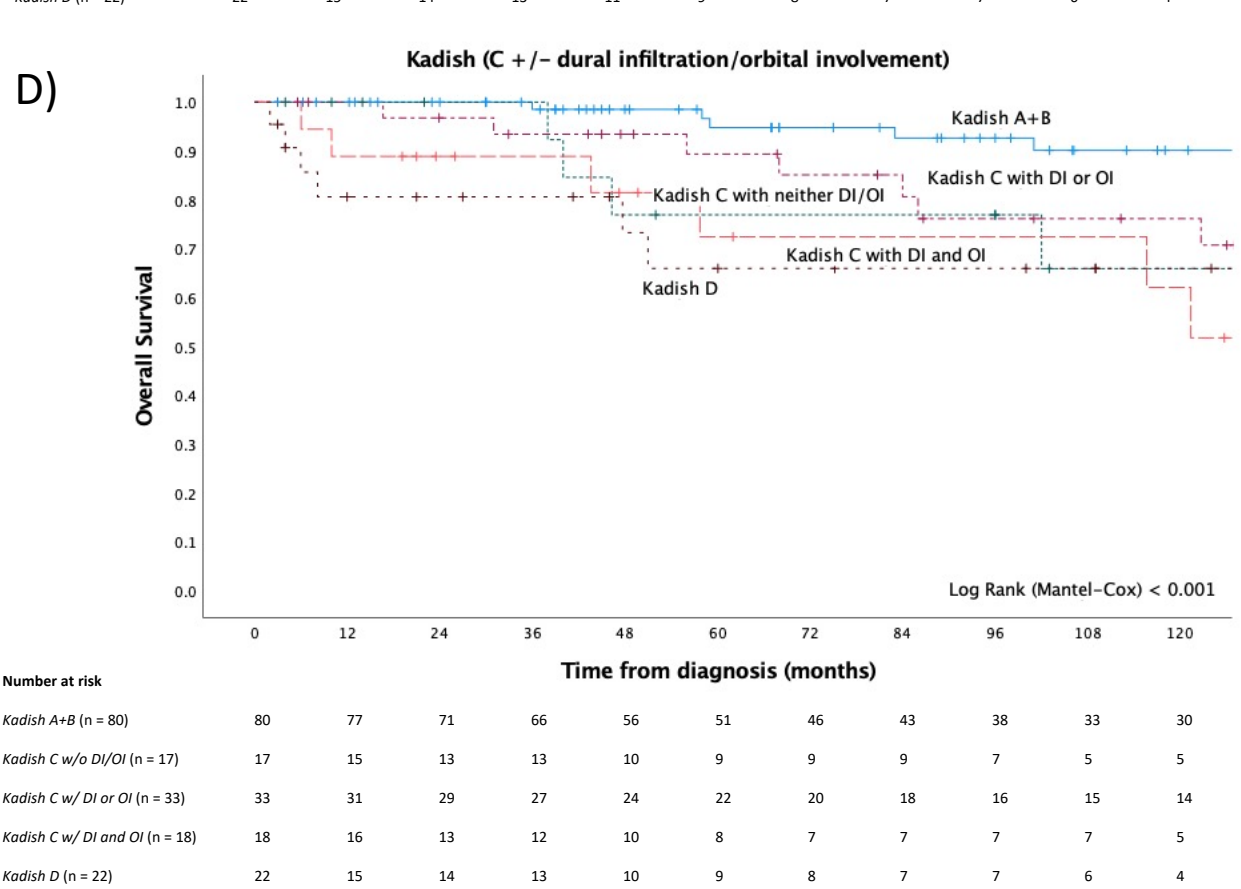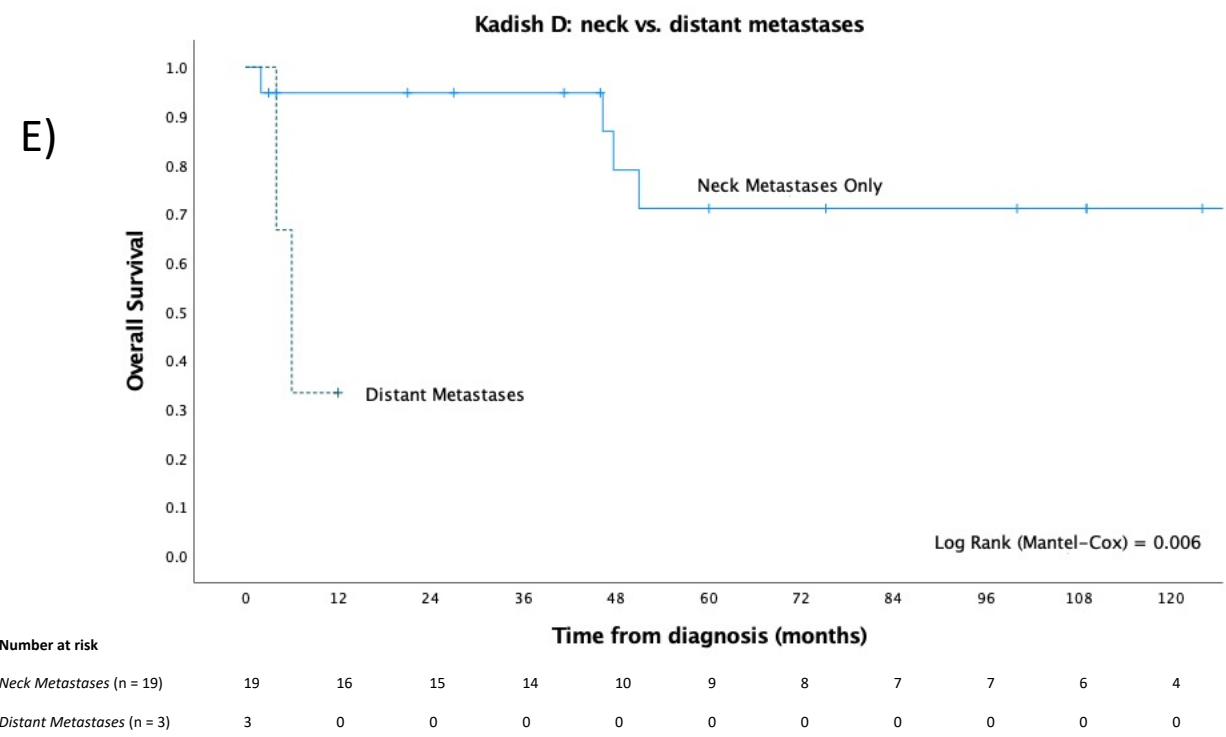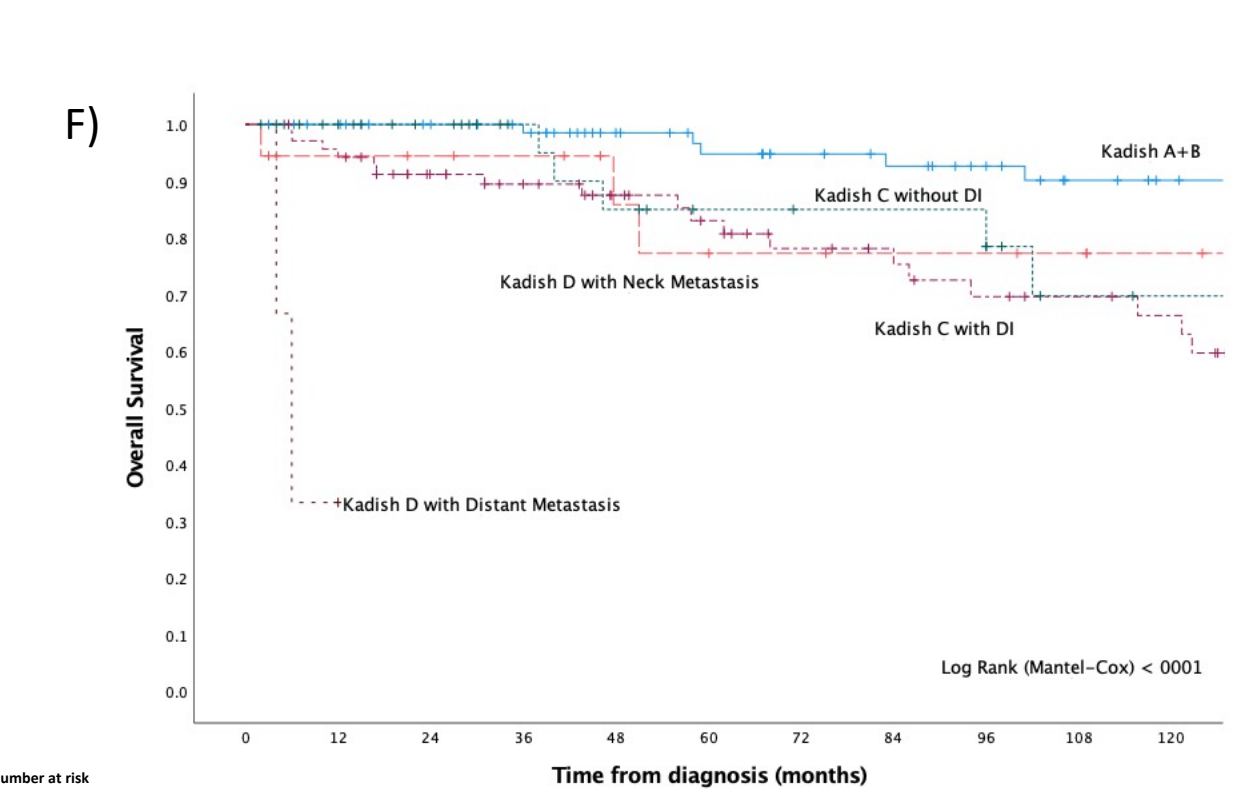

**Supplemental Figure 3.** Additional Kaplan Meier survival analyses of A)-B) Kadish A+B, Kadish C stratified into those presenting with or without orbital involvement or intracranial involvement, respectively, and Kadish D; C) Kadish A+B, Kadish C/D stratified into those presenting without either of dural infiltration or orbital involvement, those presenting with one or the other or those presenting with both, D) Kadish A+B, Kadish C stratified into those presenting without either of dural infiltration or orbital involvement, those presenting with one or the other or those presenting with both, and Kadish D, E) Kadish D cases presenting with either neck metastases only or with distant metastases; F) Kadish A+B, Kadish C stratified by presentation with or without dural infiltration, Kadish D stratified by neck or distant metastases.



A)

|                                    | Kadish A |       | Kadish B |       | Kadish C |      | Kadish D |      |
|------------------------------------|----------|-------|----------|-------|----------|------|----------|------|
|                                    | n        | %     | n        | %     | n        | %    | n        | %    |
| <b>Bony Skull Base Involvement</b> |          |       |          |       |          |      |          |      |
| Yes                                | 5        | 21.7  | 19       | 43.2  | 105      | 92.9 | 16       | 84.2 |
| No                                 | 18       | 78.3  | 25       | 56.8  | 8        | 7.1  | 3        | 15.8 |
| <b>Dural Infiltration</b>          |          |       |          |       |          |      |          |      |
| Yes                                | 0        | 0.0   | 3        | 9.4   | 71       | 65.7 | 13       | 72.2 |
| No                                 | 22       | 100.0 | 29       | 90.6  | 37       | 34.3 | 5        | 27.8 |
| <b>Intracranial Involvement</b>    |          |       |          |       |          |      |          |      |
| Yes                                | 0        | 0.0   | 3        | 11.1  | 51       | 68.9 | 12       | 66.7 |
| No                                 | 8        | 100.0 | 24       | 88.9  | 23       | 31.1 | 6        | 33.3 |
| <b>Orbital Involvement</b>         |          |       |          |       |          |      |          |      |
| Yes                                | 0        | 0.0   | 0        | 0.0   | 19       | 25.0 | 6        | 35.3 |
| No                                 | 8        | 100.0 | 27       | 100.0 | 57       | 74.0 | 11       | 64.7 |

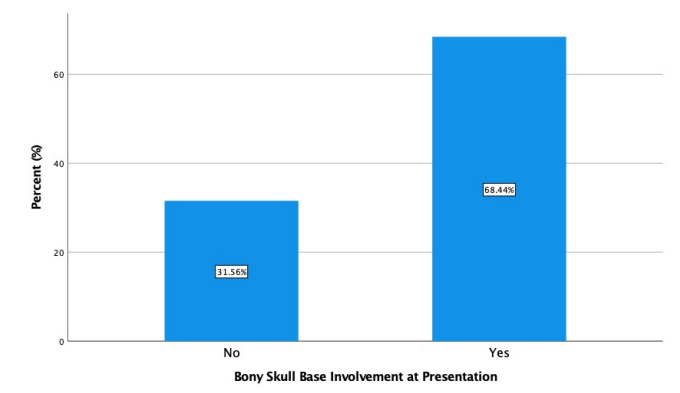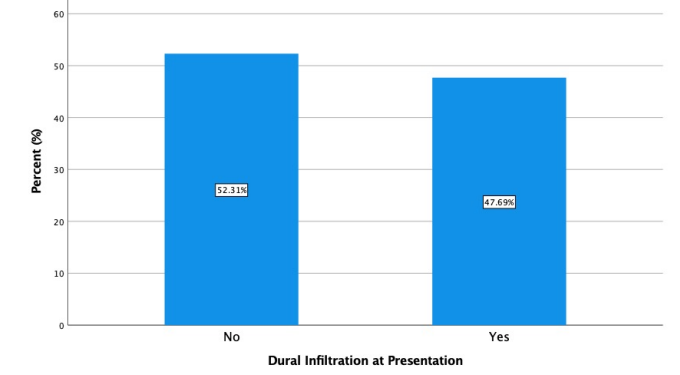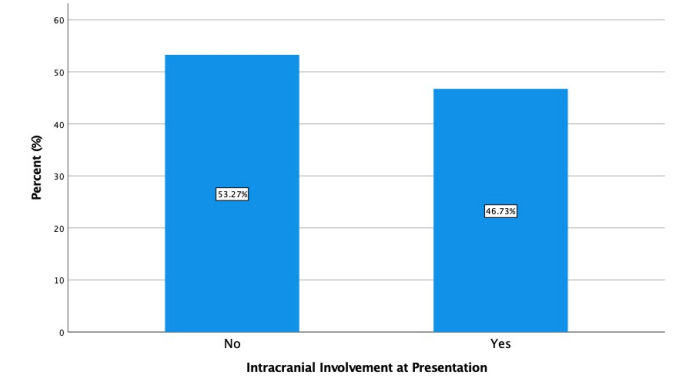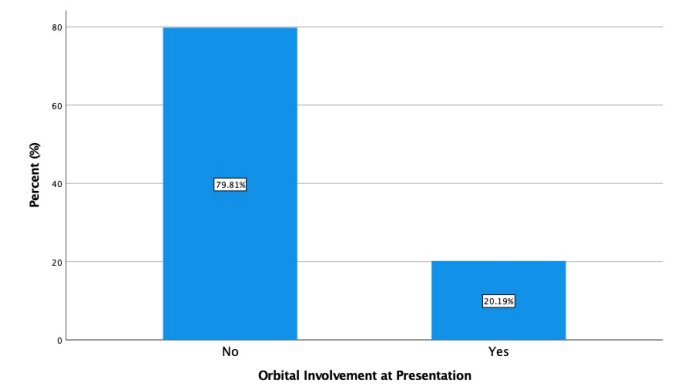

B)

|                            |              | Induction Chemotherapy |            |            |             |
|----------------------------|--------------|------------------------|------------|------------|-------------|
|                            |              | No                     | Yes        | Total      |             |
| <b>Kadish-Morita Stage</b> | Kadish A     | 18                     | 1          | 19         | $p = 0.054$ |
|                            | Kadish B     | 50                     | 4          | 54         |             |
|                            | Kadish C     | 99                     | 13         | 112        |             |
|                            | Kadish D     | 11                     | 10         | 21         |             |
|                            | <b>Total</b> | <b>178</b>             | <b>28</b>  | <b>206</b> |             |
|                            | Kadish A+B   | 68                     | 5          | 73         |             |
|                            | Kadish C+D   | 110                    | 23         | 133        |             |
| <b>Total</b>               | <b>178</b>   | <b>28</b>              | <b>206</b> |            |             |
| <b>Dural Infiltration</b>  | Yes          | 61                     | 16         | 77         | $p = 0.050$ |
|                            | No           | 76                     | 8          | 84         |             |
|                            | <b>Total</b> | <b>137</b>             | <b>24</b>  | <b>161</b> |             |

\*Fisher's Exact Test, 2-sided

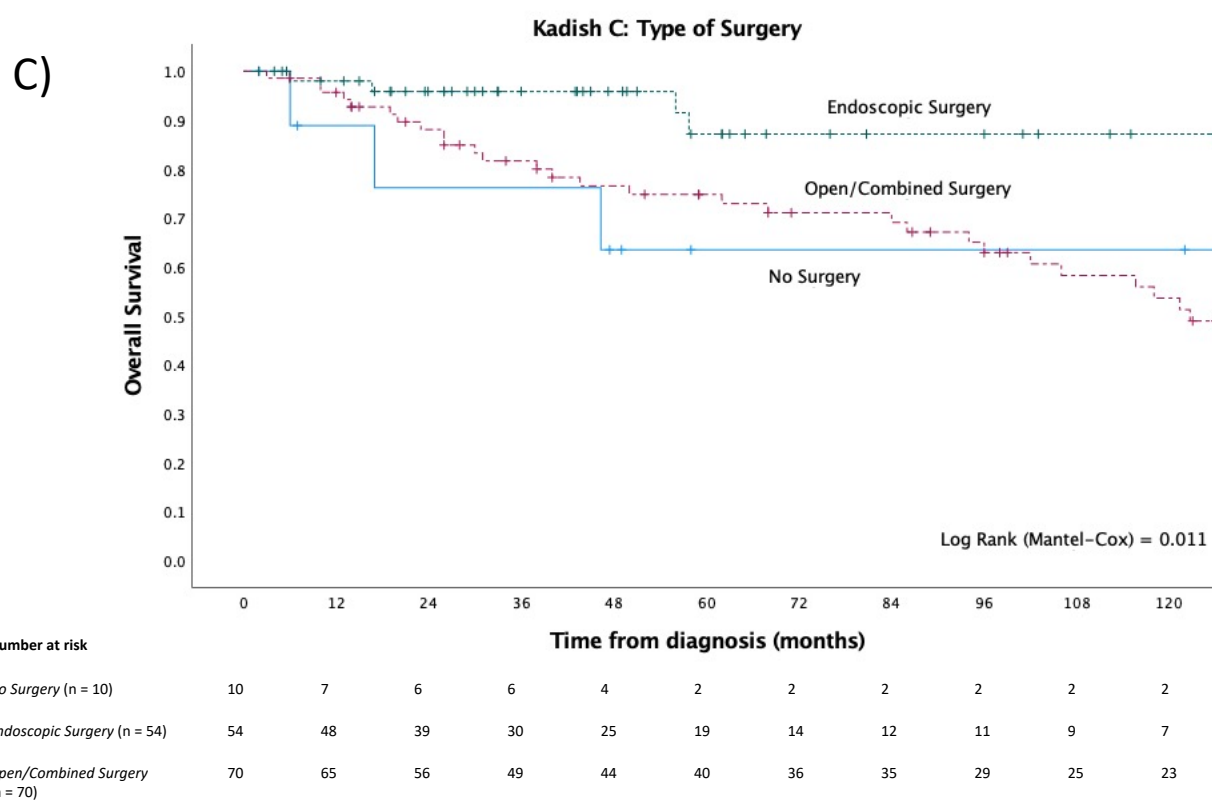

|                                    |             | Surgical Approach |                   |                      |
|------------------------------------|-------------|-------------------|-------------------|----------------------|
|                                    |             | No Surgery (n=10) | Endoscopic (n=56) | Open/Combined (n=70) |
| <b>Bony Skull Base Involvement</b> | No (n=8)    | 12.5%             | 62.5%             | 25.0%                |
|                                    | Yes (n=102) | 4.9%              | <b>48.0%</b>      | <b>47.1%</b>         |
| <b>Dural Infiltration</b>          | No (n=36)   | 5.6%              | 52.8%             | 41.7%                |
|                                    | Yes (n=69)  | 5.8%              | <b>50.7%</b>      | <b>43.5%</b>         |
| <b>Dural Resection</b>             | No (n=18)   | 5.6%              | 55.6%             | 38.9%                |
|                                    | Yes (n=90)  | 0.0%              | <b>48.9%</b>      | <b>41.1%</b>         |
| <b>Intracranial Involvement</b>    | No (n=22)   | 0.0%              | 27.3%             | 72.7%                |
|                                    | Yes (n=51)  | 9.8%              | <b>43.1%</b>      | <b>47.1%</b>         |
| <b>Orbital Involvement</b>         | No (n=56)   | 3.6%              | 35.7%             | 60.7%                |
|                                    | Yes (n=19)  | 15.8%             | <b>42.1%</b>      | <b>42.1%</b>         |
| <b>Adjuvant Radiotherapy</b>       | No (n=13)   | 15.4%             | 30.8%             | 53.8%                |
|                                    | Yes (n=121) | 6.6%              | 43.0%             | 50.4%                |

**Supplemental Figure 4.** A) Prevalence of bony skull base involvement, dural infiltration, intracranial involvement and orbital involvement by Kadish stage and accompanying bar graph of overall prevalence for primary cases. B) Numbers of patients who received induction chemotherapy based on Kadish-Morita stage and presence of dural infiltration at presentation; C) Kaplan-Meier overall survival analysis of surgical approach in Kadish C cases only with corresponding table of clinical characteristics.

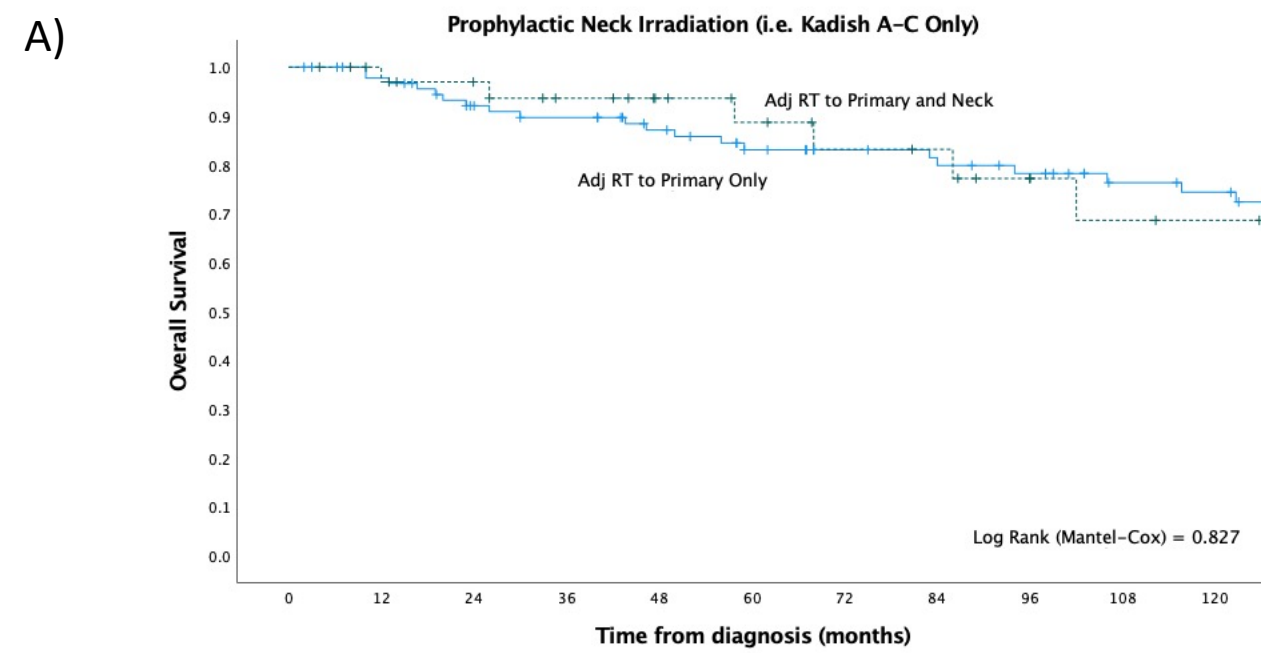

Number at risk

|                                     | 0  | 12 | 24 | 36 | 48 | 60 | 72 | 84 | 96 | 108 | 120 |
|-------------------------------------|----|----|----|----|----|----|----|----|----|-----|-----|
| Adj RT to Primary and Neck (n = 36) | 36 | 32 | 29 | 25 | 21 | 18 | 15 | 14 | 9  | 8   | 7   |
| Adj RT to Primary Only (n = 94)     | 94 | 88 | 77 | 74 | 67 | 59 | 53 | 50 | 47 | 40  | 38  |

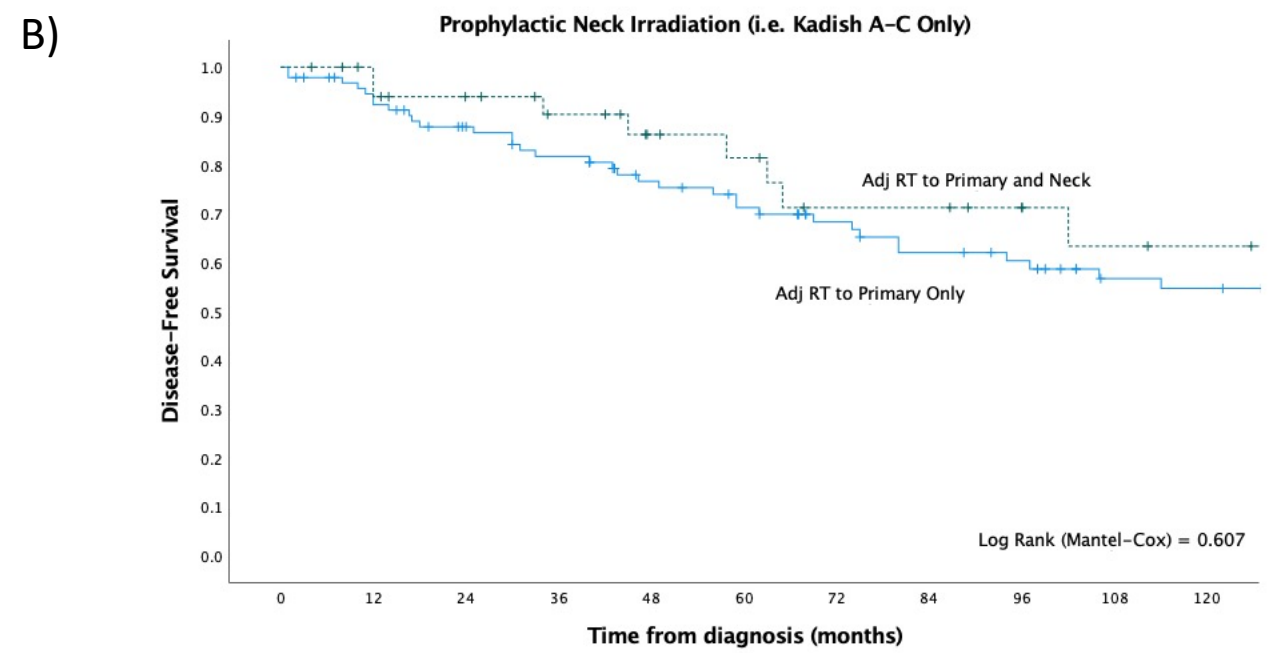

Number at risk

|                                     | 0  | 12 | 24 | 36 | 48 | 60 | 72 | 84 | 96 | 108 | 120 |
|-------------------------------------|----|----|----|----|----|----|----|----|----|-----|-----|
| Adj RT to Primary and Neck (n = 36) | 36 | 31 | 28 | 24 | 19 | 17 | 13 | 13 | 9  | 8   | 7   |
| Adj RT to Primary Only (n = 94)     | 94 | 83 | 73 | 67 | 58 | 52 | 44 | 39 | 36 | 28  | 27  |

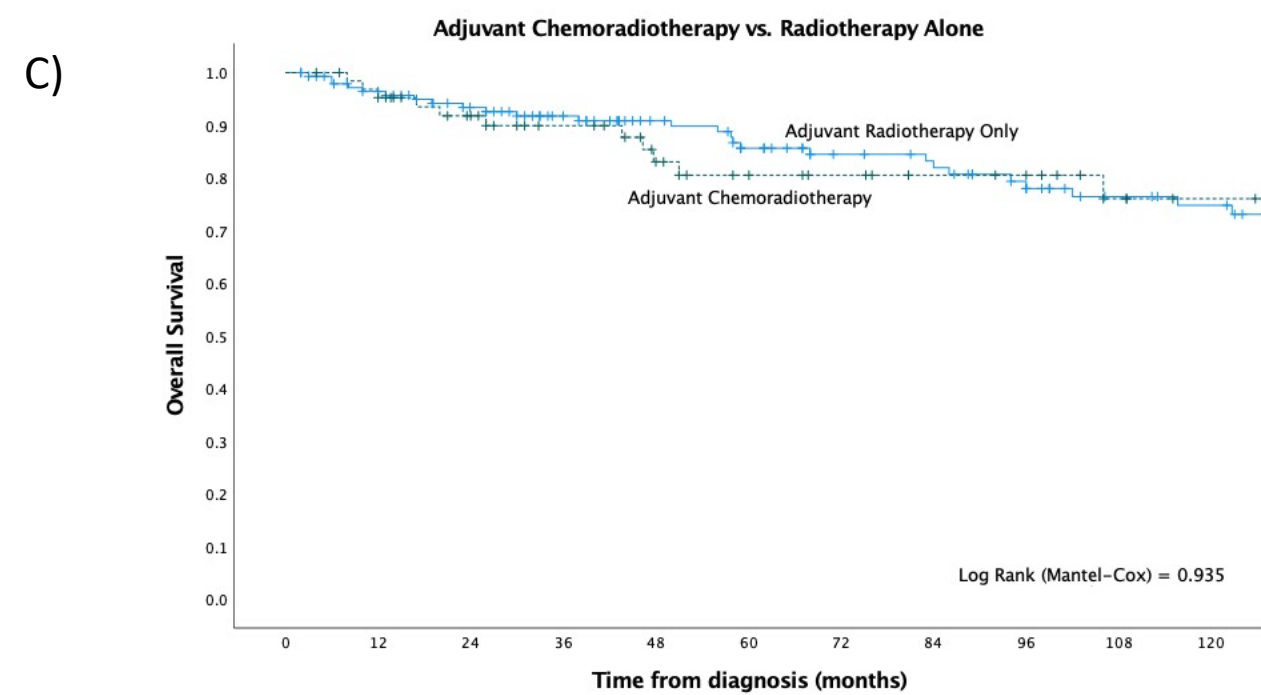

Number at risk

|                        | 0   | 12  | 24  | 36  | 48 | 60 | 72 | 84 | 96 | 108 | 120 |
|------------------------|-----|-----|-----|-----|----|----|----|----|----|-----|-----|
| Adj. RT Only (n = 145) | 145 | 131 | 117 | 102 | 89 | 79 | 69 | 65 | 55 | 48  | 45  |
| Adj. CRT (n = 65)      | 65  | 59  | 50  | 43  | 34 | 29 | 26 | 23 | 21 | 16  | 13  |

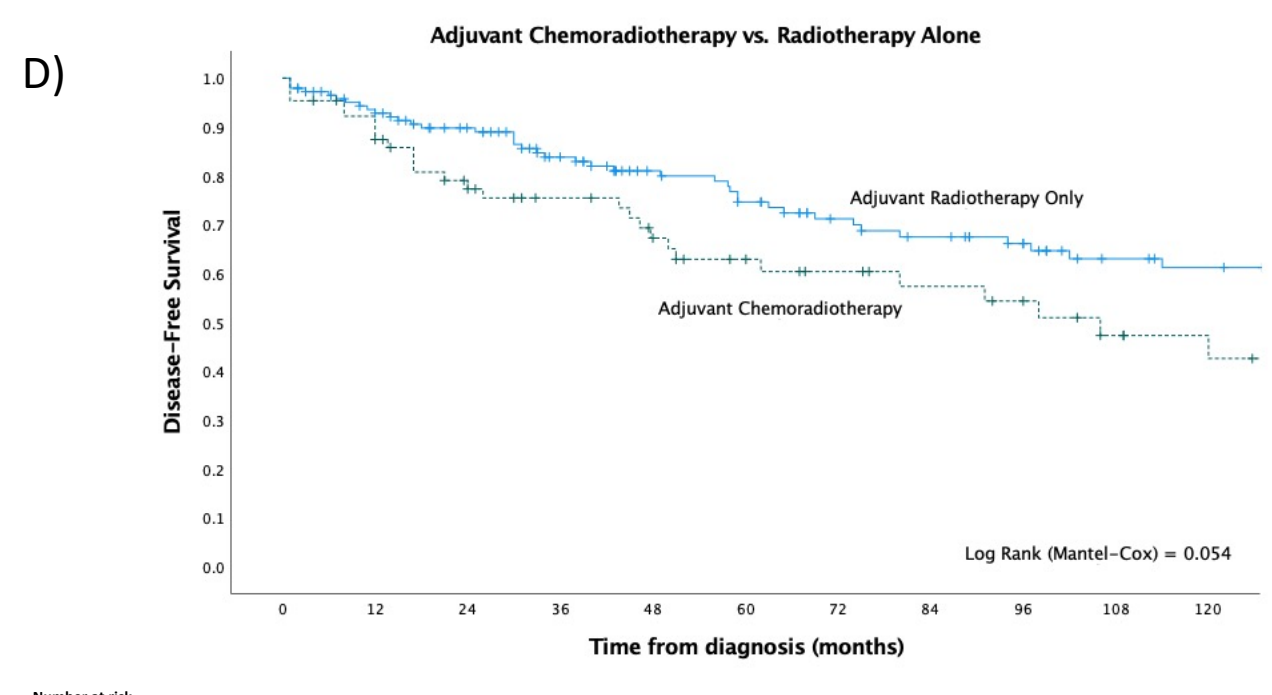

Number at risk

|                        | 0   | 12  | 24  | 36 | 48 | 60 | 72 | 84 | 96 | 108 | 120 |
|------------------------|-----|-----|-----|----|----|----|----|----|----|-----|-----|
| Adj. RT Only (n = 144) | 144 | 125 | 111 | 92 | 77 | 69 | 58 | 53 | 45 | 37  | 34  |
| Adj. CRT (n = 65)      | 65  | 54  | 43  | 38 | 31 | 26 | 22 | 19 | 16 | 12  | 9   |

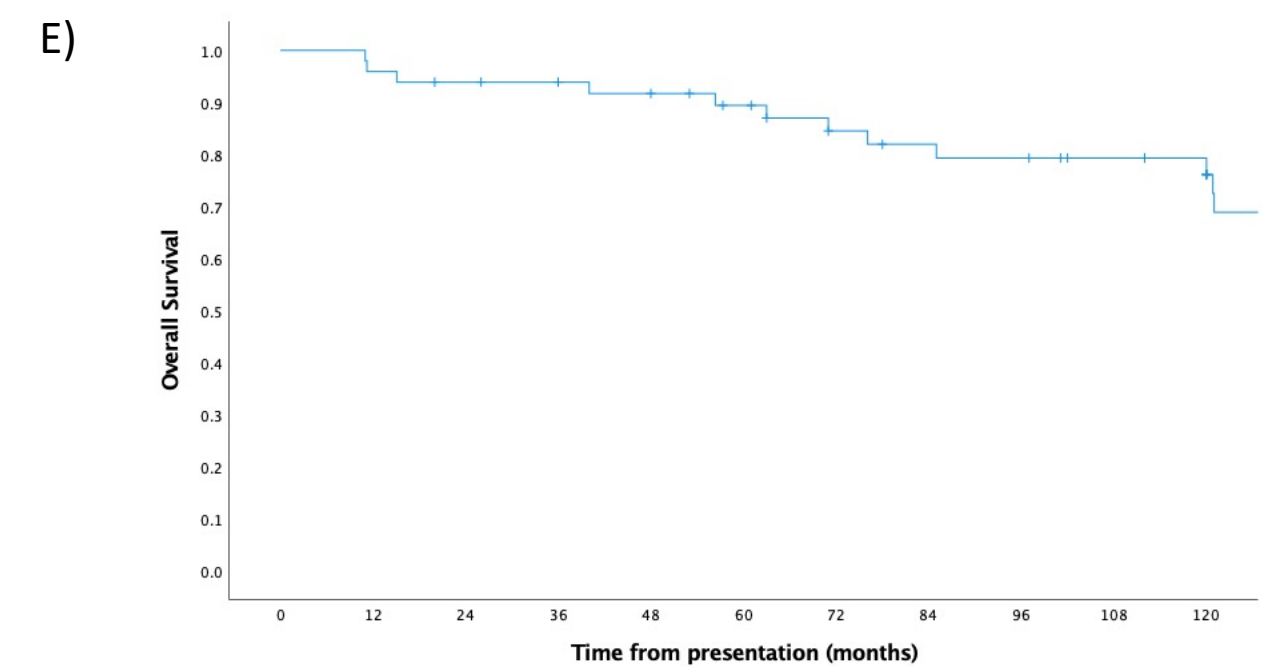

Number of Events

|                  | 0  | 12 | 24 | 36 | 48 | 60 | 72 | 84 | 96 | 108 | 120 |
|------------------|----|----|----|----|----|----|----|----|----|-----|-----|
| Number of Events | 0  | 2  | 3  | 3  | 4  | 5  | 7  | 8  | 9  | 9   | 10  |
| Number at Risk   | 49 | 47 | 45 | 43 | 41 | 38 | 33 | 31 | 30 | 27  | 21  |

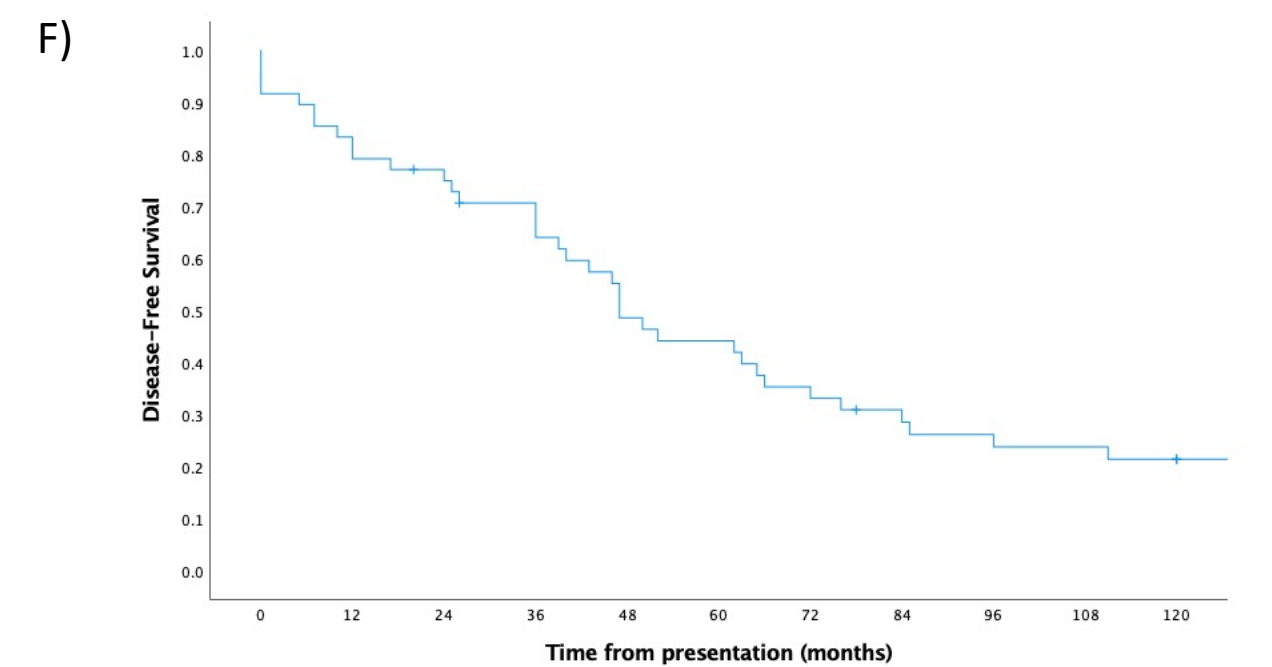

Number of Events

|                  | 0  | 12 | 24 | 36 | 48 | 60 | 72 | 84 | 96 | 108 | 120 |
|------------------|----|----|----|----|----|----|----|----|----|-----|-----|
| Number of Events | 0  | 10 | 12 | 17 | 24 | 26 | 31 | 33 | 35 | 35  | 36  |
| Number at Risk   | 48 | 38 | 35 | 29 | 22 | 20 | 15 | 12 | 10 | 10  | 7   |

**Supplemental Figure 5.** Additional Kaplan-Meier survival analyses of A)-B) overall and disease-free survival between those who receive prophylactic neck irradiation (i.e. Kadish A-C cases only) and those who do not, respectively; C)-D) overall and disease-free survival comparing adjuvant chemoradiotherapy and radiotherapy only); E)-F) overall and disease-free survival of first recurrences at presentation.

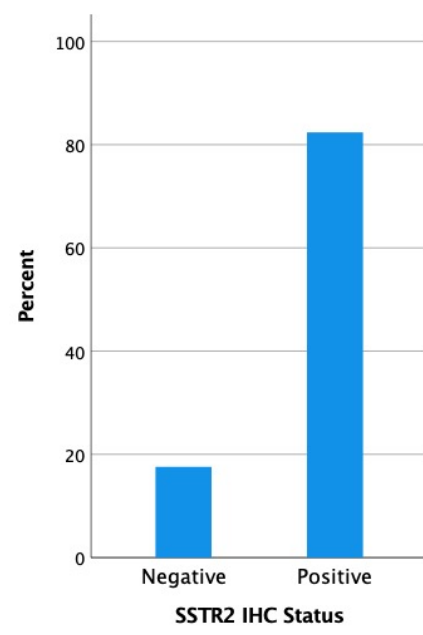

**Supplemental Figure 6: Expression data on SSTR2 in ONB.** 82.4% of the cohort, for which immunohistochemical staining for SSTR2 were available, were positive for the biomarker.

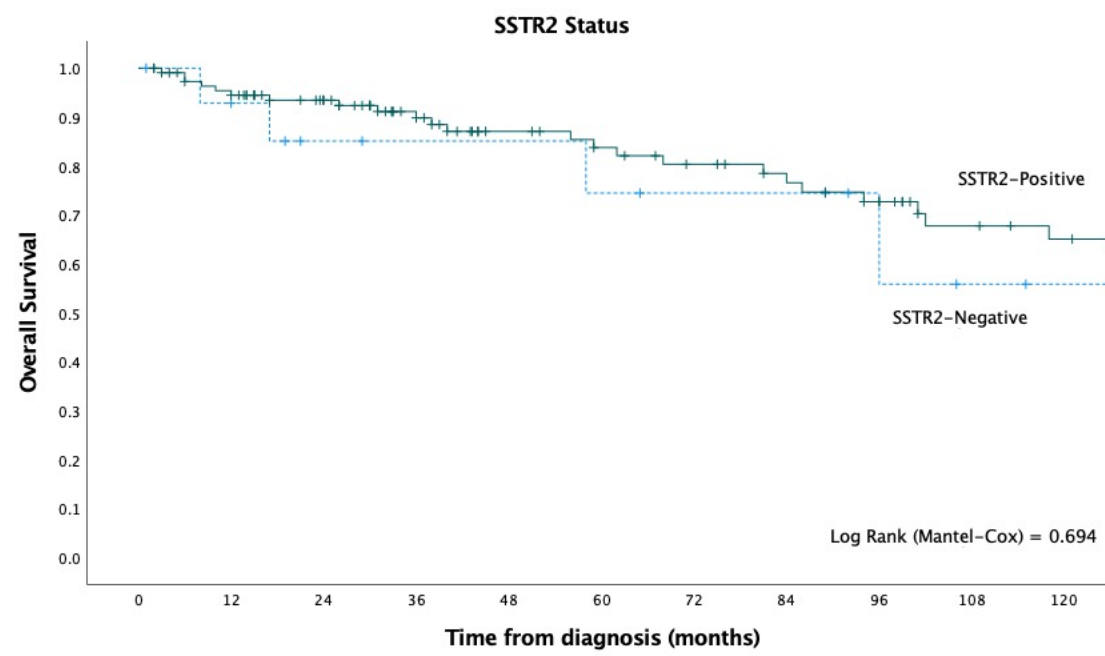

| Number at risk                  | 0   | 12  | 24 | 36 | 48 | 60 | 72 | 84 | 96 | 108 | 120 |
|---------------------------------|-----|-----|----|----|----|----|----|----|----|-----|-----|
| <i>SSTR2-Negative</i> (n = 15)  | 15  | 12  | 9  | 8  | 8  | 7  | 6  | 6  | 3  | 2   | 1   |
| <i>SSTR2-Positive</i> (n = 114) | 114 | 101 | 86 | 67 | 55 | 50 | 45 | 40 | 34 | 27  | 24  |

**Supplemental Figure 7.** Kaplan-Meier survival curve of SSTR2 status

### ***Dulguerov modified-TNM Staging System***

#### *Tumour*

|    |                                                                                                                                           |
|----|-------------------------------------------------------------------------------------------------------------------------------------------|
| T1 | Tumour involving nasal cavity and/or paranasal sinuses (excluding the sphenoid), sparing the most superior ethmoidal cells                |
| T2 | Tumour involving the nasal cavity and/or paranasal sinuses (including the sphenoid), with extension to or erosion of the cribriform plate |
| T3 | Tumour extending into the orbit or protruding into the anterior cranial fossa, without dural invasion                                     |
| T4 | Tumour involving the brain                                                                                                                |

#### *Node*

|    |                                            |
|----|--------------------------------------------|
| N0 | No cervical lymph node metastasis          |
| N1 | Any form of cervical lymph node metastasis |

#### *Metastasis*

|    |                    |
|----|--------------------|
| M0 | No metastasis      |
| M1 | Distant metastasis |

### ***Kadish Staging System***

|   |                                                                                                                               |
|---|-------------------------------------------------------------------------------------------------------------------------------|
| A | Confined to the nasal cavity                                                                                                  |
| B | Involvement of one or more paranasal sinuses                                                                                  |
| C | Extension beyond the nasal cavity and paranasal sinuses involving cribriform lamina, skull base, orbit or intracranial cavity |
| D | Regional lymph node or distant metastasis                                                                                     |



|                             |         | U.K.                |                                        | U.S.A.                                             |                                          |                                                  |                                     |                                         | Europe                                      |                                                |                                           |                                             |                                                             |
|-----------------------------|---------|---------------------|----------------------------------------|----------------------------------------------------|------------------------------------------|--------------------------------------------------|-------------------------------------|-----------------------------------------|---------------------------------------------|------------------------------------------------|-------------------------------------------|---------------------------------------------|-------------------------------------------------------------|
|                             |         | UCL/UCLH,<br>London | Guy's and<br>St.<br>Thomas',<br>London | MD<br>Anderson<br>Cancer<br>Center,<br>Houston, TX | Stanford<br>University,<br>Palo Alto, CA | Johns Hopkins<br>University,<br>Baltimore,<br>MD | Emory<br>University,<br>Atlanta, GA | Yale<br>University,<br>New Haven,<br>CT | University of<br>Insubria,<br>Varese, Italy | Universita<br>degli Studi di<br>Brescia, Italy | Instituto<br>de ISPA,<br>Oviedo,<br>Spain | Beaumont<br>Hospital,<br>Dublin,<br>Ireland | Ludwig-<br>Maximilians<br>University,<br>Munich,<br>Germany |
| <b>Total</b>                |         | 33                  | 7                                      | 135                                                | 31                                       | 47                                               | 23                                  | 2                                       | 29                                          | 21                                             | 28                                        | 32                                          | 16                                                          |
| Sex                         | Male    | 16                  | 2                                      | 83                                                 | 13                                       | 28                                               | 13                                  | 1                                       | 11                                          | 11                                             | 11                                        | 20                                          | 7                                                           |
|                             | Female  | 17                  | 5                                      | 52                                                 | 18                                       | 19                                               | 8                                   | 1                                       | 18                                          | 10                                             | 15                                        | 12                                          | 8                                                           |
|                             | Missing | 0                   | 0                                      | 0                                                  | 0                                        | 0                                                | 2                                   | 0                                       | 0                                           | 0                                              | 2                                         | 0                                           | 1                                                           |
| Hyam's Grade                | 1       | 8                   | 1                                      | 2                                                  | 0                                        | 8                                                | 2                                   | 0                                       | 6                                           | 0                                              | 12                                        | 8                                           | 0                                                           |
|                             | 2       | 15                  | 2                                      | 82                                                 | 12                                       | 23                                               | 15                                  | 0                                       | 16                                          | 11                                             | 4                                         | 10                                          | 0                                                           |
|                             | 3       | 4                   | 0                                      | 17                                                 | 3                                        | 11                                               | 1                                   | 0                                       | 7                                           | 9                                              | 5                                         | 10                                          | 0                                                           |
|                             | 4       | 4                   | 1                                      | 10                                                 | 0                                        | 5                                                | 0                                   | 0                                       | 0                                           | 1                                              | 0                                         | 4                                           | 0                                                           |
|                             | Missing | 2                   | 3                                      | 24                                                 | 16                                       | 0                                                | 5                                   | 2                                       | 0                                           | 0                                              | 7                                         | 0                                           | 16                                                          |
| Kadish-Morita Stage         | A       | 9                   | 2                                      | 18                                                 | 2                                        | 4                                                | 1                                   | 0                                       | 5                                           | 1                                              | 0                                         | 0                                           | 5                                                           |
|                             | B       | 7                   | 0                                      | 36                                                 | 7                                        | 4                                                | 5                                   | 0                                       | 7                                           | 10                                             | 1                                         | 10                                          | 0                                                           |
|                             | C       | 10                  | 5                                      | 57                                                 | 14                                       | 34                                               | 12                                  | 2                                       | 16                                          | 10                                             | 6                                         | 20                                          | 10                                                          |
|                             | D       | 2                   | 0                                      | 12                                                 | 8                                        | 5                                                | 4                                   | 0                                       | 1                                           | 0                                              | 0                                         | 2                                           | 0                                                           |
|                             | Missing | 5                   | 0                                      | 12                                                 | 0                                        | 0                                                | 1                                   | 0                                       | 0                                           | 0                                              | 21                                        | 0                                           | 1                                                           |
| Dulguerov T-Stage           | T1      | 10                  | 2                                      | 0                                                  | 4                                        | 8                                                | 0                                   | 0                                       | 6                                           | 5                                              | 5                                         | 0                                           | 0                                                           |
|                             | T2      | 11                  | 0                                      | 0                                                  | 5                                        | 13                                               | 7                                   | 0                                       | 9                                           | 5                                              | 5                                         | 0                                           | 0                                                           |
|                             | T3      | 1                   | 4                                      | 0                                                  | 6                                        | 12                                               | 10                                  | 0                                       | 7                                           | 7                                              | 4                                         | 0                                           | 0                                                           |
|                             | T4      | 4                   | 1                                      | 0                                                  | 15                                       | 10                                               | 5                                   | 0                                       | 7                                           | 4                                              | 0                                         | 0                                           | 0                                                           |
|                             | Missing | 7                   | 0                                      | 135                                                | 1                                        | 4                                                | 1                                   | 2                                       | 0                                           | 0                                              | 14                                        | 32                                          | 16                                                          |
| Dural Infiltration          | Yes     | 10                  | 1                                      | 52                                                 | 15                                       | 18                                               | 5                                   | 1                                       | 11                                          | 8                                              | 4                                         | 0                                           | 0                                                           |
|                             | No      | 20                  | 6                                      | 16                                                 | 17                                       | 18                                               | 16                                  | 1                                       | 18                                          | 13                                             | 11                                        | 0                                           | 0                                                           |
|                             | Missing | 3                   | 0                                      | 67                                                 | 0                                        | 11                                               | 2                                   | 0                                       | 0                                           | 0                                              | 13                                        | 32                                          | 16                                                          |
| Bony Skull Base Involvement | Yes     | 22                  | 5                                      | 68                                                 | 24                                       | 28                                               | 18                                  | 2                                       | 19                                          | 16                                             | 4                                         | 0                                           | 0                                                           |
|                             | No      | 8                   | 2                                      | 46                                                 | 7                                        | 12                                               | 3                                   | 0                                       | 10                                          | 4                                              | 3                                         | 0                                           | 0                                                           |
|                             | Missing | 3                   | 0                                      | 21                                                 | 0                                        | 7                                                | 21                                  | 0                                       | 0                                           | 1                                              | 21                                        | 32                                          | 16                                                          |
| Intracranial Involvement    | Yes     | 0                   | 0                                      | 65                                                 | 12                                       | 11                                               | 9                                   | 0                                       | 0                                           | 0                                              | 3                                         | 0                                           | 0                                                           |
|                             | No      | 0                   | 0                                      | 49                                                 | 19                                       | 29                                               | 12                                  | 0                                       | 0                                           | 0                                              | 5                                         | 0                                           | 0                                                           |
|                             | Missing | 33                  | 7                                      | 21                                                 | 0                                        | 7                                                | 2                                   | 2                                       | 29                                          | 21                                             | 20                                        | 32                                          | 16                                                          |
| Orbital Involvement         | Yes     | 0                   | 0                                      | 29                                                 | 6                                        | 3                                                | 4                                   | 0                                       | 0                                           | 0                                              | 1                                         | 0                                           | 0                                                           |
|                             | No      | 0                   | 0                                      | 83                                                 | 25                                       | 39                                               | 17                                  | 0                                       | 0                                           | 0                                              | 6                                         | 0                                           | 0                                                           |
|                             | Missing | 33                  | 7                                      | 23                                                 | 0                                        | 5                                                | 2                                   | 2                                       | 29                                          | 21                                             | 21                                        | 32                                          | 16                                                          |

**Supplemental Table 2.** Clinical information for all cases, at presentation, by centre.

|                               | Total n |                           | n   | %    |
|-------------------------------|---------|---------------------------|-----|------|
| <b>Sex</b>                    | 273     | Female                    | 125 | 45.8 |
|                               |         | Male                      | 148 | 54.2 |
| <b>SSTR2 Status</b>           | 142     | Positive                  | 117 | 82.4 |
|                               |         | Negative                  | 25  | 17.6 |
| <b>Hyams Grade</b>            | 235     | 1                         | 43  | 18.3 |
|                               |         | 2                         | 126 | 53.6 |
|                               |         | 3                         | 46  | 19.6 |
|                               |         | 4                         | 20  | 8.5  |
| <b>Kadish-Morita Stage</b>    | 247     | A                         | 26  | 10.5 |
|                               |         | B                         | 56  | 22.7 |
|                               |         | C                         | 142 | 57.5 |
|                               |         | D                         | 23  | 9.3  |
| <b>Dulguerov T-Stage</b>      | 148     | T1                        | 34  | 23.0 |
|                               |         | T2                        | 44  | 29.7 |
|                               |         | T3                        | 38  | 25.7 |
|                               |         | T4                        | 32  | 21.6 |
| <b>Type of Surgery</b>        | 238     | None                      | 16  | 6.7  |
|                               |         | Endoscopic                | 120 | 50.4 |
|                               |         | Open                      | 85  | 35.7 |
|                               |         | Combined                  | 15  | 6.3  |
|                               |         | Neck Dissection Only      | 1   | 0.4  |
|                               |         | Debulking Only            | 1   | 0.4  |
| <b>Adjuvant Treatment</b>     | 112     | None                      | 31  | 12.7 |
|                               |         | Radiotherapy only         | 146 | 59.8 |
|                               |         | Chemotherapy only         | 2   | 0.8  |
|                               |         | Chemoradiotherapy         | 65  | 26.6 |
| <b>Induction Chemotherapy</b> | 213     | No                        | 183 | 85.9 |
|                               |         | Yes                       | 30  | 14.1 |
| <b>Recurrence Site</b>        | 222     | No Recurrence             | 158 | 71.2 |
|                               |         | Local                     | 29  | 13.1 |
|                               |         | Cervical nodal metastasis | 16  | 7.2  |
|                               |         | Parotid                   | 3   | 1.4  |
|                               |         | Intracranial              | 8   | 3.6  |
|                               |         | Locoregional              | 2   | 0.9  |
|                               |         | Distant                   | 6   | 2.7  |

**Supplemental Table 3.** Clinicopathological characteristics and treatment details of primary cases (i.e. no previous treatment).

|                                    | SSTR2 Status |       |          |      | p-value |
|------------------------------------|--------------|-------|----------|------|---------|
|                                    | Negative     |       | Positive |      |         |
|                                    | n            | %     | n        | %    |         |
| <b>Sex</b>                         |              |       |          |      | 0.073   |
| Female                             | 16           | 66.7  | 53       | 45.3 |         |
| Male                               | 8            | 33.3  | 64       | 54.7 |         |
| <b>Age</b>                         |              |       |          |      | 0.163   |
| <65                                | 22           | 91.7  | 90       | 76.9 |         |
| >65                                | 2            | 8.3   | 27       | 23.1 |         |
| <b>Hyams Grade</b>                 |              |       |          |      | 0.003   |
| Grade 1                            | 6            | 28.6  | 20       | 18.7 |         |
| Grade 2                            | 4            | 19.0  | 62       | 57.9 |         |
| Grade 3                            | 6            | 28.6  | 19       | 17.8 |         |
| Grade 4                            | 5            | 23.8  | 6        | 5.6  |         |
| <b>Kadish-Morita Stage</b>         |              |       |          |      | 0.807   |
| Kadish A                           | 3            | 23.1  | 18       | 16.4 |         |
| Kadish B                           | 1            | 7.7   | 18       | 16.4 |         |
| Kadish C                           | 8            | 61.5  | 68       | 61.8 |         |
| Kadish D                           | 1            | 7.7   | 6        | 5.5  |         |
| <b>Dulguerov T-Stage</b>           |              |       |          |      | 0.162   |
| T1                                 | 8            | 42.1  | 20       | 20.6 |         |
| T2                                 | 6            | 31.6  | 27       | 27.8 |         |
| T3                                 | 3            | 15.8  | 30       | 30.9 |         |
| T4                                 | 2            | 10.5  | 20       | 20.6 |         |
| <b>Dural Infiltration</b>          |              |       |          |      | 0.630   |
| No                                 | 13           | 65.0  | 61       | 58.7 |         |
| Yes                                | 7            | 35.0  | 43       | 41.3 |         |
| <b>Bony Skull Base Involvement</b> |              |       |          |      | 0.529   |
| No                                 | 5            | 35.7  | 28       | 26.7 |         |
| Yes                                | 9            | 64.3  | 77       | 73.3 |         |
| <b>Intracranial Involvement</b>    |              |       |          |      | 0.678   |
| No                                 | 4            | 66.7  | 27       | 52.9 |         |
| Yes                                | 2            | 33.3  | 24       | 47.1 |         |
| <b>Orbital Involvement</b>         |              |       |          |      | 1.000   |
| No                                 | 5            | 100.0 | 45       | 84.9 |         |
| Yes                                | 0            | 0.0   | 8        | 15.1 |         |

**Supplemental Table 4.** Clinicopathological characteristics of SSTR2-positive and negative primary tumours.
